# Supplementary material
Source: Springer Nature journal article supplement (https://www.springermedizin.de/resource/supplementary/12947_2012_427_MOESM1_ESM.pdf/9555736)

28/03/2008 12:03:09  
15

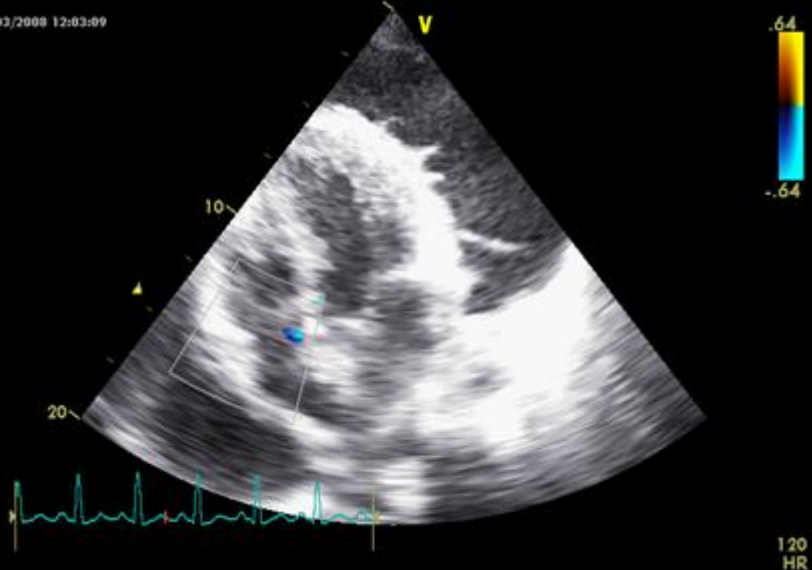

Supplement: MOESM1 [file 9555736]
